# Supplementary material for: Geographic patterns of mtDNA and Z-linked sequence variation in the Common Chiffchaff and the ‘chiffchaff complex’
Source: PubMed Central journal article supplement (PMC6319743; doi:10.1371/journal.pone.0210268), 2019-01-04

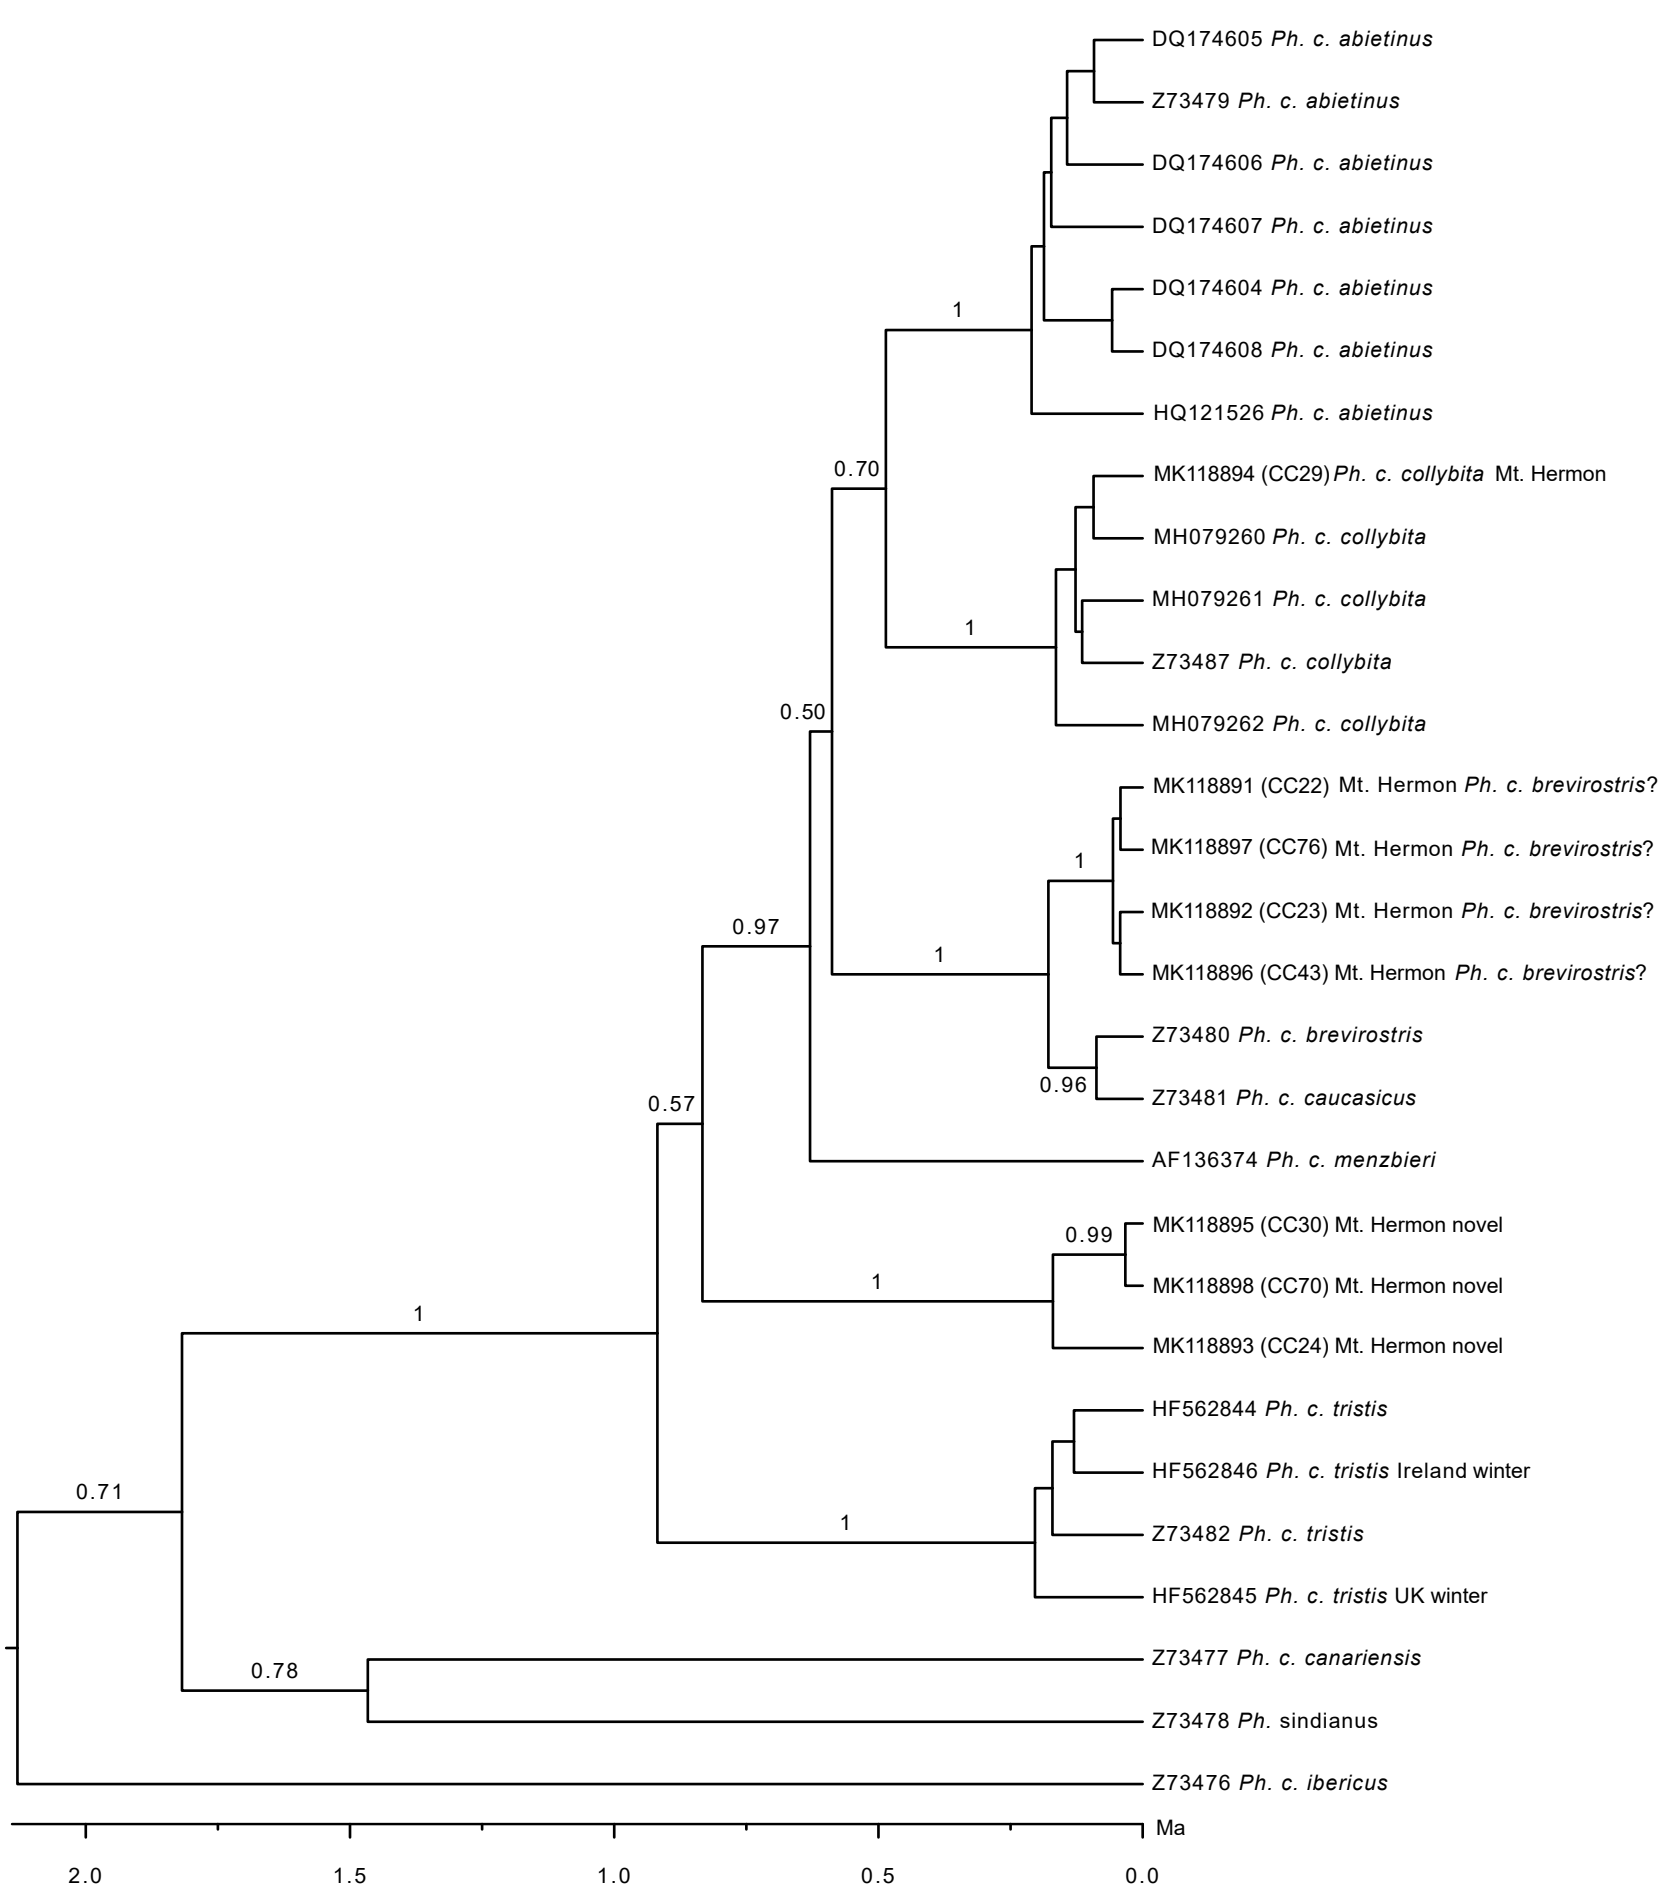

Supplement: pone.0210268.s002.pdf [file pone.0210268.s002.pdf]
